# Supplementary material
Source: ML conference proceedings conference paper supplement (https://aclanthology.org/D19-1050)
Supplement: Attachment [file EMNLP 2019 final supplemental.pdf › EMNLP 2019 final supplemental.pdf]

## A Supplemental figures

Figure 8 shows the change in brain decoding performance after fine-tuning grouped by subject, under both the mean squared error and rank metrics.

Figure 9 shows the change in brain decoding performance after fine-tuning grouped by model, under both the mean squared error and rank metrics.

## B Hyperparameters

| Hyperparameter          | Value              |
|-------------------------|--------------------|
| Batch size              | 32                 |
| Learning rate           | $2 \times 10^{-5}$ |
| LR warmup proportion    | 10%                |
| Maximum sequence length | 128                |
| Fine-tuning steps       | 250                |

Table 3: Fine-tuning hyperparameters, shared across fine-tuning runs for all tasks. These hyperparameters mostly follow the suggestions of [Devlin et al. \(2018\)](#).

| Hyperparameter          | Value |
|-------------------------|-------|
| Training epochs         | 10    |
| Loss metric             | L1    |
| Maximum rank of $B$     | 30    |
| Positive semi-definite? | Yes   |

Table 4: Syntactic probe hyperparameters (Section 3.2.2), following the defaults of [Hewitt and Manning \(2019\)](#).

## C Custom task information

For each language modeling task, we randomly sampled and concatenated documents from the Toronto Books Corpus ([Kiros et al., 2015](#)). Each language modeling dataset contained 1,000,000 training sentences and 100,000 development and test sentences. (We generated over-sized datasets in order to ensure that multiple runs of the same model would be highly unlikely to see similar samples of training data.)

For the part-of-speech task, we tagged each sentence using spaCy ([Honnibal and Montani, 2017](#)) and followed the same random masking procedure as in the typical cloze language modeling task. spaCy assigned 49 unique part-of-speech tags to the sentences, yielding a 49-way classification task.

For all tasks, we retained the secondary BERT objective requiring the model to predict whether two sentences are adjacent or not in a source document. (This objective did not differ from the standard setup for the part-of-speech task; for the scrambling task, the input sentences were independently randomly shuffled.)

Table 5 shows training examples from each of these custom tasks. Figure 10 shows learning curves and validation accuracy curves for the models trained on each task.

Figure 8: Within-subject changes in brain decoding performance for different models, relative to the subject's brain decoding performance with the pre-trained BERT model. Error bars are 95% CIs pooling across decoders learned for different runs of each model (up to 8 per model).

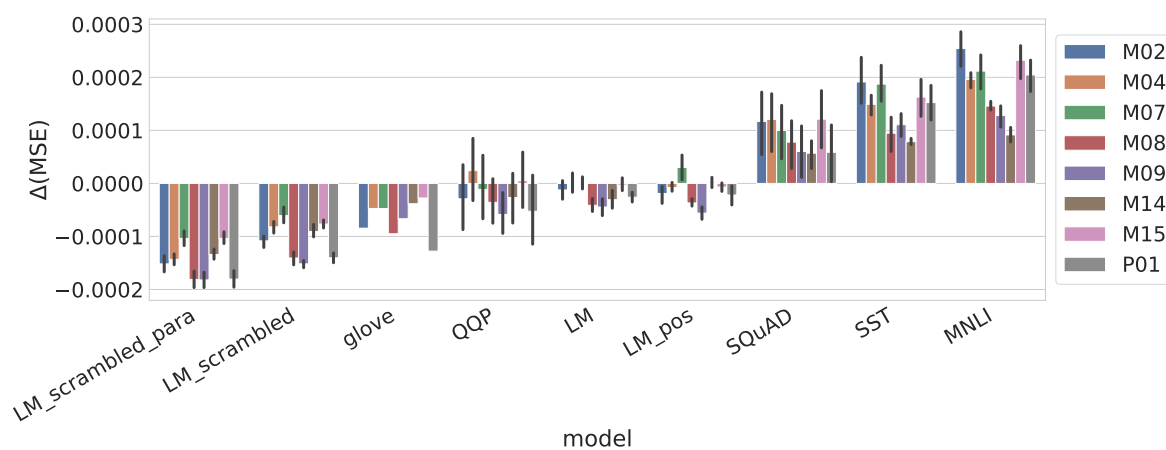

(a) Mean squared error metric

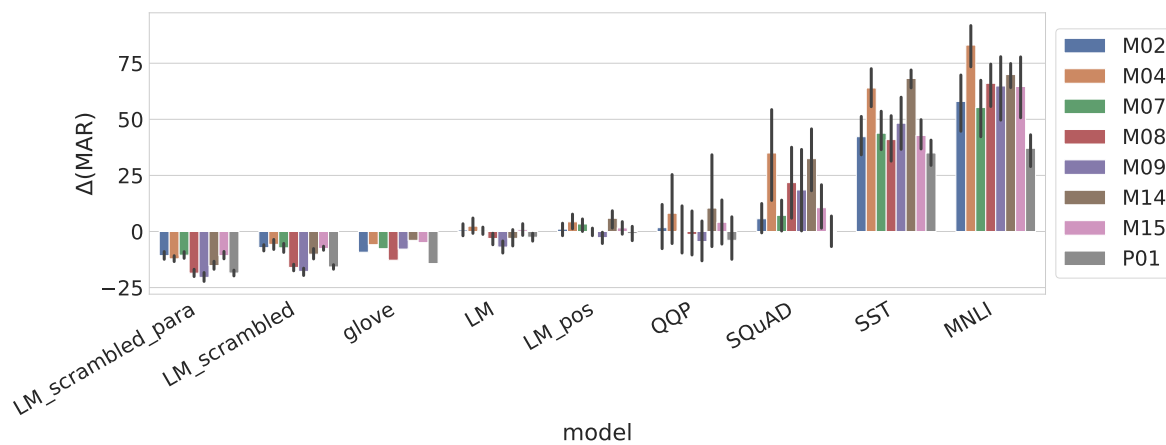

(b) Average rank metric

Figure 9: Within-model changes in brain decoding performance for different subjects, relative to the corresponding subject’s brain decoding performance with the pre-trained BERT model. Error bars are 95% CIs pooling across decoders learned for different runs of each model (up to 8 per model).

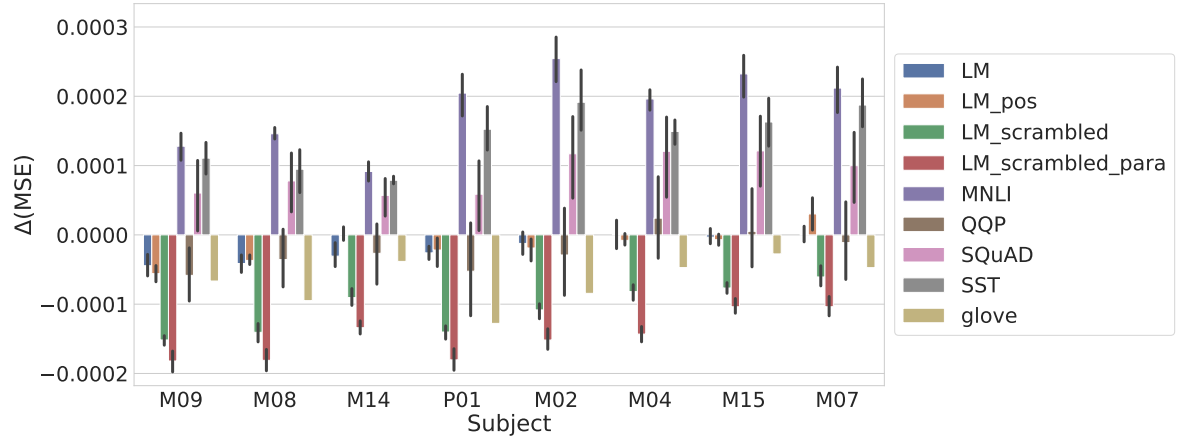

(a) Mean squared error metric

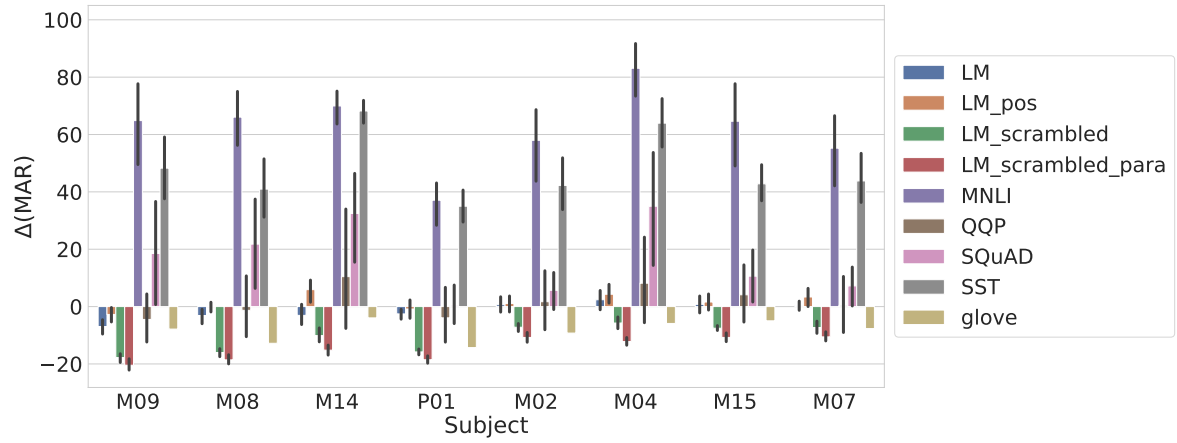

(b) Average rank metric

Figure 10: Learning curves (training set loss and evaluation set accuracy) for custom language modeling tasks.

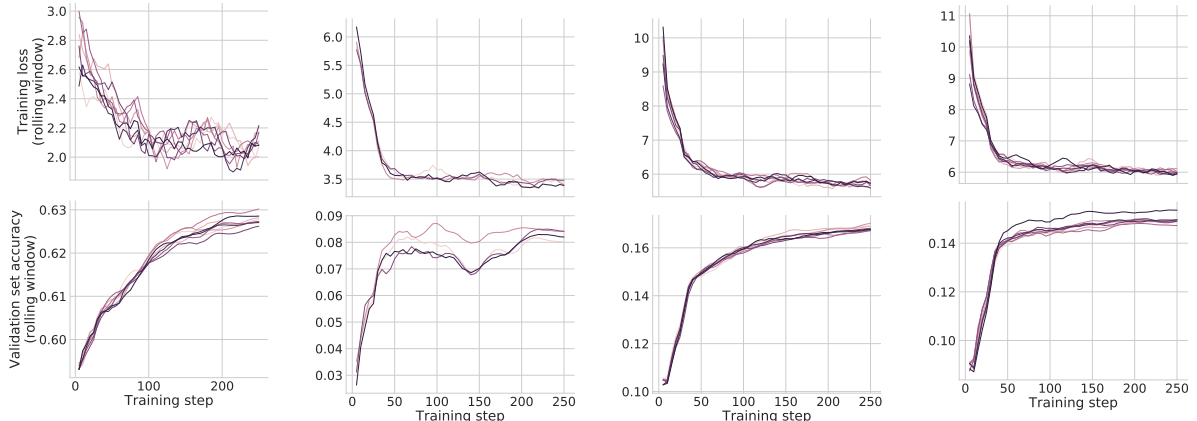

(a) LM (standard BERT task). Chance accuracy:  $\frac{1}{30522} \approx 3 \times 10^{-5}$ .

(b) LM-pos. Chance accuracy:  $\frac{1}{49} \approx 0.02$ .

(c) LM-scrambled. Chance accuracy:  $\frac{1}{30522} \approx 3 \times 10^{-5}$ .

(d) LM-scrambled-para. Chance accuracy:  $\frac{1}{30522} \approx 3 \times 10^{-5}$ .

Table 5: Examples from custom language modeling tasks.

| Input                                                                                                                                                                                                                             | Ground-truth output |
|-----------------------------------------------------------------------------------------------------------------------------------------------------------------------------------------------------------------------------------|---------------------|
| [MASK] minutes in she began to cry .                                                                                                                                                                                              | two                 |
| the door opened and lilith [MASK] in with worry on her face .                                                                                                                                                                     | walked              |
| she grabbed several pairs of jeans and some t - shirts [MASK] her closet                                                                                                                                                          | from                |
| (a) LM                                                                                                                                                                                                                            |                     |
| Input                                                                                                                                                                                                                             | Ground-truth output |
| , and [MASK] so drive can .                                                                                                                                                                                                       | i                   |
| instead ##k kn documents pots important dish water be ##s greasy , [MASK] were of of and soon legal in dirty ##ick personal ##ks high to a bath and looking pan awaiting the i with ago pan lifestyle face many ##ils d , years . | piles               |
| by connected will if you the ##tell we the that ##i [MASK] us lead ?                                                                                                                                                              | people              |
| , and i so drive can . abraham want , i myself i [MASK] cars and whenever his , two , dad                                                                                                                                         | have                |
| (b) LM-scrambled                                                                                                                                                                                                                  |                     |
| Input                                                                                                                                                                                                                             | Ground-truth output |
| scent sweat ta very [MASK] aroma ##ed caught , , a close a his . ##ana cabaret sand male skin she ##wny of up and ##al mu ##ting slick faint ...                                                                                  | ##wood              |
| , no in ! themselves supper with eyes included his ‘ , [MASK] began . the the alone everyone cried enjoying standing ...                                                                                                          | triumph             |
| , she told off out would wash followed “ asked her i with ” take . voice [MASK] ...                                                                                                                                               | stepped             |
| (c) LM-scrambled-para                                                                                                                                                                                                             |                     |
| Input                                                                                                                                                                                                                             | Ground-truth output |
| you ’ ve probably just gotten yourself off schedule a few days [MASK] you’ve been so busy and stressed .                                                                                                                          | CD                  |
| a couple of lordlings [MASK] .                                                                                                                                                                                                    | VBD                 |
| the blond boy , who at fourteen was [MASK] much taller than anderra ... showed no signs of discomposure .                                                                                                                         | RB                  |
| (d) LM-pos                                                                                                                                                                                                                        |                     |
